# Supplementary material
Source: HighWire-hosted journal article supplement (https://qdcxjkg.com/highwire/filestream/114137/field_highwire_adjunct_files/0/ERJ_02251-2013_Fietze.pdf)
Supplement: ERJ_02251-2013_Fietze.pdf [file ERJ_02251-2013_Fietze.pdf]

Warnung: Dieses Formular wird in der aktuellen Version von Acrobat bzw. Adobe Reader nicht unterstützt.  
Zur vollständigen Unterstützung ist ein Upgrade auf die neueste Version erforderlich.
